# Supplementary material for: Rosiglitazone Regulates Anti-Inflammation and Growth Inhibition via PTEN
Source: Hindawi journal article supplement (doi:10.1155/2014/787924), 2014-01-01
Supplement: f1 [file 787924.f1.pdf]

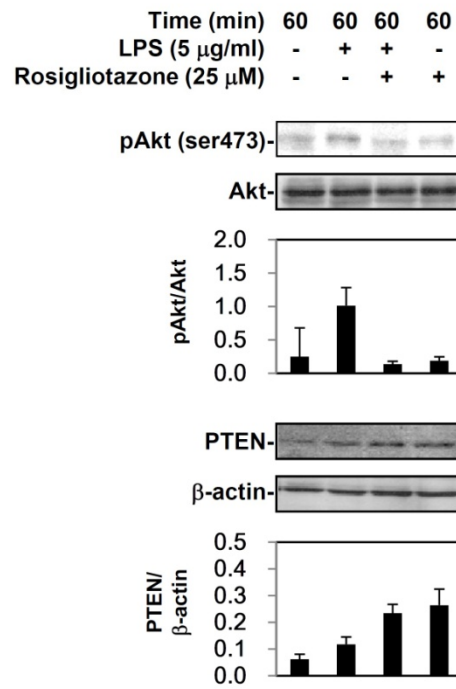

**Supplementary figure 1** Rosiglitazone affects PTEN expression. Cells were treated with 25  $\mu$ M rosiglitazone prior to incubation with 5  $\mu$ g/ml LPS for 60 min. Cell lysates were harvested for determining the levels of phospho-Akt, Akt, PTEN, and  $\beta$ -actin by Western blotting. Data shown are representative of three individual experiments. Data are expressed as mean  $\pm$  SEM obtained from three individual cultures.

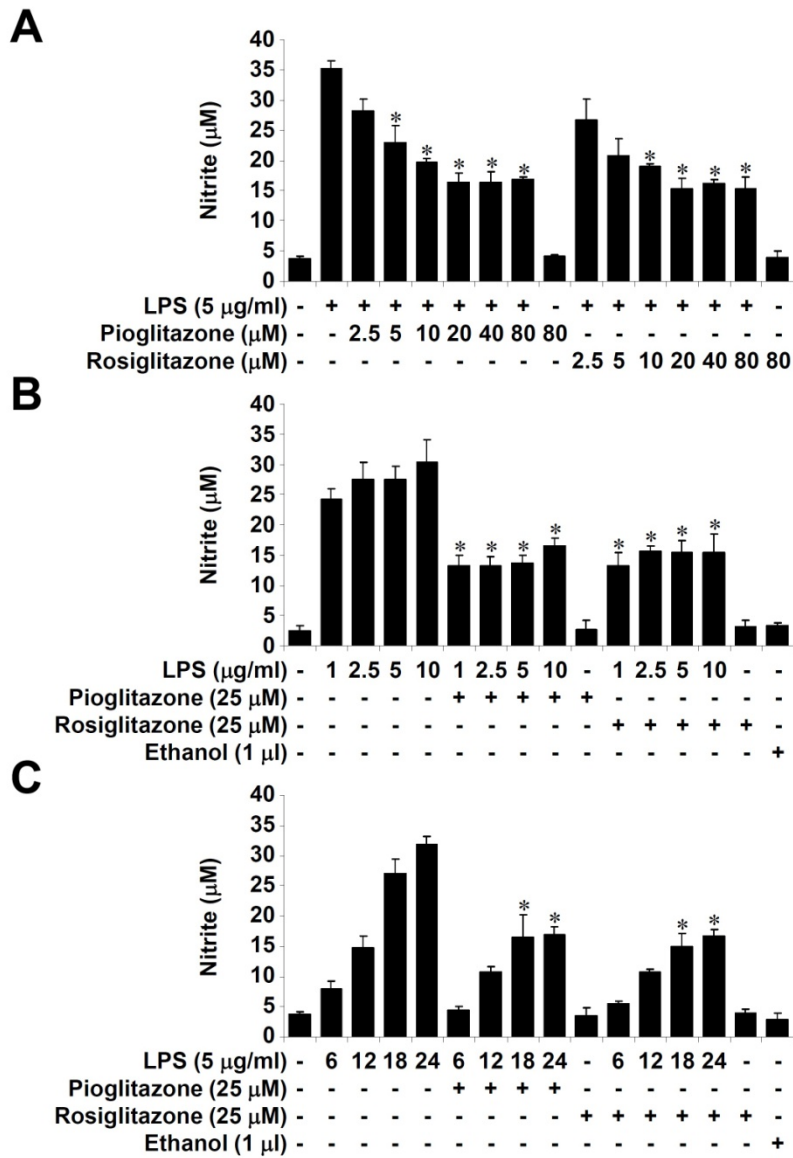

**Supplementary figure 2** Effects of pioglitazone and rosiglitazone on LPS-induced NO release (A-C). Cells were treated with 2.5~80 µM pioglitazone or rosiglitazone for 30 min before being stimulated with 1~10 µg/ml LPS for indicated times. Cell supernatants were collected for determining NO release. Data are expressed as mean ± SEM obtained from three individual cell cultures. \**P* < 0.05 compared with the LPS group.
